# Supplementary material
Source: publisher site journal article supplement (http://www.degruyter.com/publication/journal_key/BIOMAT/downloadAsset/BIOMAT_Instructions%20for%20Authors.pdf)
Supplement: Supplementary file 1 [file BIOMAT_Instructions%20for%20Authors.pdf]

## **BioNanoMaterials – Information for Authors**

### **Scope and policy of the Journal**

*BioNanoMaterials* (*BioNanoMat*) provides rapid publication for reports on fundamentals and clinical application of biomaterials, in particular nanobiomaterials.

The multidisciplinary Journal publishes Review articles, Highlight articles and Letters having an impact to classical disciplines such as biology, chemistry and physics.

*Reviews* are published by invitation only, but suggestions to the Editor-in-Chief are welcome. *Highlights* are short review articles, e.g. on emerging frontiers in BioNanoMedicine. *Letters* are original research articles that carry clear take home messages on 2-3 print pages, 2-3 figures and may be linked to supporting information.

Submission of a manuscript to *BioNanoMaterials* implies that the work described has not been published before and is not under consideration for publication elsewhere. It is the corresponding author's responsibility to ensure that all authors see the manuscript and approve of its submission for publication. Once the manuscript is accepted, it must not be published elsewhere without the consent of the copyright holders.

### **Policy of the journal**

**Ethical conduct of research:** Authors must describe safeguards to meet standards of ethical conduct of research. Institutional human subject studies should comply with the principles laid down in the Declaration of Helsinki, adopted by the 18th World Medical Assembly, Helsinki, Finland, June 1964, and recently amended at the General Assembly in October 2013. The manuscript should contain a statement that the study has been approved by the Ethical Committee of the institution where the study was performed, and that the study subjects, or their legal guardians, gave informed consent for participation in the study.

**Conflict of interest:** Upon submission, authors are required to declare any possible conflict of interest, funding or employment. A conflict of interest for a given manuscript also exists when a participant in the peer review and publication process – author, reviewer, and editor – has ties to activities that could inappropriately influence his or her judgment, regardless of whether judgment is, in fact, affected. Financial relationships with industry

(for example, employment, consultancies, stock ownership, honoraria, expert testimony), either directly or through immediate family, are usually considered the most important conflicts of interest. However, conflicts can occur for other reasons, such as financial support of the study, ties to health insurance, politics or other stakeholders, personal relationships, academic competition, and intellectual passion.

The relevant information must be given in the **Author Statement** included in your manuscript before the Reference section as follows:

### **Author Statement**

**Funding:** Authors state no funding involved.

**Conflict of interest:** Authors state no conflict of interest.

**Material and Methods:** Informed consent: Informed consent has been obtained from all individuals included in this study.

**Ethical approval:** The research related to human use has been complied with all the relevant national regulations, institutional policies and in accordance the tenets of the Helsinki Declaration, and has been approved by the authors' institutional review board or equivalent committee.

**Publication ethics:** For information on plagiarism, please refer to COPE Committee on Publication Ethics. Please note that *BNM* uses the check program "iThenticate" to assess similarity to previous publications. Any previously published material must be referenced appropriately in the manuscript. The submission of a manuscript to *BNM* implies that the work described has not been published before and is not under consideration for publication elsewhere. All authors indicate that they agree to the submission of the manuscript and the correctness of the content and that upon acceptance for publication the submission will be published under the license: Creative Commons Attribution-NonCommercial-NoDerivs (CC BY-NC-ND 4.0)

### **Submission of manuscripts**

Manuscripts must be submitted online at the following URL:

<http://mc.manuscriptcentral.com/bnm>.

Together with the electronic manuscript files, for each manuscript a cover letter must be

submitted which contains a brief statement by the authors as to i) the novelty and ii) the relevance to a broader, interdisciplinary community. Please address the cover letter to: **Editorial Office BioNanoMaterials**

**De Gruyter GmbH**

**Genthiner Str. 13**

**D-10785 Berlin, Germany**

For online submission it is mandatory to suggest possible reviewers for the peer reviewing process. Please indicate the names and address details (including e-mail address) of at least four potential referees who are not editors or members of the Editorial Board of the Journal.

### **Review of manuscripts and speed of publication**

Papers will be independently reviewed by at least two referees selected by the Editors of *BioNanoMaterials*. On the average, decisions will be reached within three to four weeks of submission. When papers are accepted subject to revision, major revision is allowed only once. The revised manuscript must be submitted within two months of the authors' notification of conditional acceptance. It is the aim of the Journal to publish papers in an online-only ('Ahead of Print') format within four months after their receipt by the Editorial Office.

### **Article Processing Charges**

All articles published in *BioNanoMaterials* are fully open access. If you have been acquired as author by a board member of the journal or your article has been recommended for submission by the board of the DGBM, you will not be asked to pay for your publication. In case that you aren't a member of the DGBM, you will have to pay the article processing charge in the amount of € 2,000 (further discount possible) or you have to become a member of the DGBM.

### **Preparation of manuscripts**

Manuscripts must be written in clear and concise English and should be regarded as final texts. No changes may be made at the proof state other than correction of printer's errors.

### **General format and length**

Manuscripts (including table legends, figure legends and references) should be typed double-spaced with font size 12 letters. Supplementary material (comprehensive figures and videos) will be published only

online. Pages should be numbered (with the title page as 1) and have margins of 2.5 cm (1 inch) on all sides. Footnotes in the text should be avoided; parentheses should be used instead. Full length papers and reviews should occupy no more than eight printed pages, Letters and Highlight articles should not exceed four printed pages. Each full page of printed text corresponds to approximately 1000 words. Please allow sufficient space for tables and illustrations within the page limit.

### **Sections**

*Full length papers* should be organized into Title page, Abstract, Key words, Introduction, Results, Discussion, Materials and Methods, Acknowledgments, References, Tables and Figure legends. *Letters* should be subdivided into an Abstract, Key words, and a single section of main text without headings. Experimental procedures should be described in legends to figures or footnotes to tables. Acknowledgments and References should be presented as in full length papers.

### **Title page**

The Title page should include (a) a short and informative full article title (series titles are not accepted); (b) names of all authors (with one forename in full for each author), followed by their affiliations (department, institution, city with postcode, country); (c) the mailing address, fax and phone number and e-mail address of the corresponding author; (d) a running title of 50 characters or less. If there is more than one institution involved in the work, authors' names should be linked by superscript consecutive numbers to the appropriate institutions. If required, small superscript letters should be used to indicate present addresses. (e) a self-explaining, catchy table of content figure.

### **Abstract and Key words**

The second page of the manuscript should contain the Abstract and the Key words. The Abstract should be a single paragraph of no more than 200 words (full length paper or review) or 100 words (Letters or Highlights) which must be comprehensible to readers before they have read the paper. Abbreviations and reference citations should be avoided. Below the Abstract up to six Key words, which are not part of the title, should be given in alphabetical order and separated by semicolons.

**Acknowledgments** should be placed at the end of the text. Names of funding organizations should be written in their entirety.

## References

For citations authors are encouraged to rely as far as possible upon articles published in primary research journals.

Unpublished results and personal communications should be cited as such within the text; personal communications must be substantiated by a letter of permission. Meeting abstracts may not be cited.

Within the text references should be cited by author and date; et al. should be used if there are more than three authors. At the end of the text citations should be in alphabetical order and should contain complete titles. The number of references should not exceed 150 for reviews or 30 for Highlights. Journal names should be given by employing commonly used abbreviations. Online resources to full journal names and their abbreviations can be found at

<http://guides.lib.berkeley.edu/bioscience-journal-abbreviations>. The volume number of a journal should be given in italics. Citations should be in accordance with the following examples:

- Kyte, J. and Doolittle, R.F. (1982). A simple method for displaying the hydrophobic character of a protein. *J. Mol. Biol.* 157, 105-132.
- Khan, M.A. (1987). HLA and ankylosing spondylitis. In: *Ankylosing Spondylitis. New Clinical Applications in Rheumatology*, Vol. I, J.J. Calabro and C. Dick, eds. (Lancaster, England: MTP Press, Ltd.), pp. 23-45.
- Hogan, B., Costantini, F., and Lacy, E. (1986). *Manipulating the Mouse Embryo: A Laboratory Manual* (Cold Spring Harbor, NY, USA: Cold Spring Harbor Laboratory Press).

**Tables** should be typed on separate pages and be numbered consecutively using Arabic numerals. If a table is exceptionally large or contains special symbols it should be submitted camera-ready. A short descriptive title, column headings, and (if necessary) footnotes should make each table self-explanatory. Please indicate in the manuscript the approximate position of each table.

## Illustrations

Electronic files containing illustrations should be provided in a generic graphics format as given under the link 'Supported file formats' on the *BioNanoMaterials* manuscript submission homepage

(<https://mc.manuscriptcentral.com/bnm>).

For reproduction, high-resolution (approx. 600 dpi and better) images are required. All

figures will be reduced in size to fit, wherever possible, the width of a single column, i.e. 80 mm, or a double column, i.e. 168 mm, of text. Ideally, single column figures should be submitted with a width of 100 mm, double column figures with a width of 210 mm. Lettering of all figures within the article should be uniform in style (preferably a sans serif typeface) and of sufficient size (so that the final height will be approximately 2 mm). Upper-case letters A, B, C etc. should be used to identify individual parts of multi-part figures. All figures must be cited in the text in numerical order. Reference to figures is to be made as Figure 1 etc. in the text and captions. *Color plates:* Authors are encouraged to submit illustrations in color if necessary for their scientific content. Publication of color figures is provided free of charge both in online and print editions.

*Line drawings:* These should also be provided as high-resolution files. No additional artwork, redrawing or typesetting will be done by the publisher. Note the faint shading or stippling may be lost upon reproduction, heavy staining or stippling may appear black.

*Figure legends:* These should be provided on separate, numbered manuscript pages. All symbols and abbreviations used in the figures must be explained, except for standard abbreviations or others defined in the preceding text.

## Offprints/PDF files

The electronic files of typeset articles in Adobe Acrobat PDF format are provided free of charge and are sent to the e-mail address of corresponding authors upon publication.

## Note for authors of NIH-funded research

Walter de Gruyter Publishers acknowledge that the author of an NIH funded article retains the right to provide a copy of the final manuscript to NIH upon acceptance for publication or thereafter, for public archiving in PubMed Central 12 months after publication in *BioNanoMaterials*. Note that only the accepted author's version of the manuscript, not the PDF file of the published article, may be used for NIH archiving.

Please contact the Editorial Office if you have any further questions (Tel.: +49-30-26005-245; Fax: +49-30-26005-315; e-mail: [bnm.editorial@degruyter.com](mailto:bnm.editorial@degruyter.com)). We will do our best to assist you.
